# Supplementary material for: A ‘point–line–point’ hybrid electrocatalyst for bi-functional catalysis of oxygen evolution and reduction reactions
Source: Royal Society of Chemistry journal article supplement (doi:10.1039/c5ta09327a), 2016-01-01
Supplement: c5ta09327a1.pdf [file c5ta09327a1.pdf]

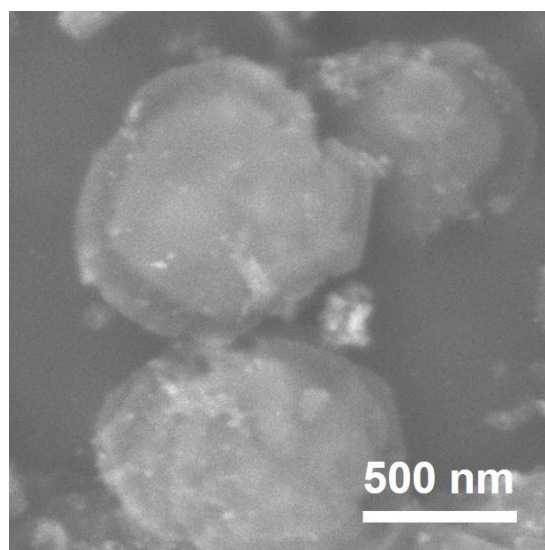

**Fig. S1.** SEM image of CoFeMgAl LDH flakes.

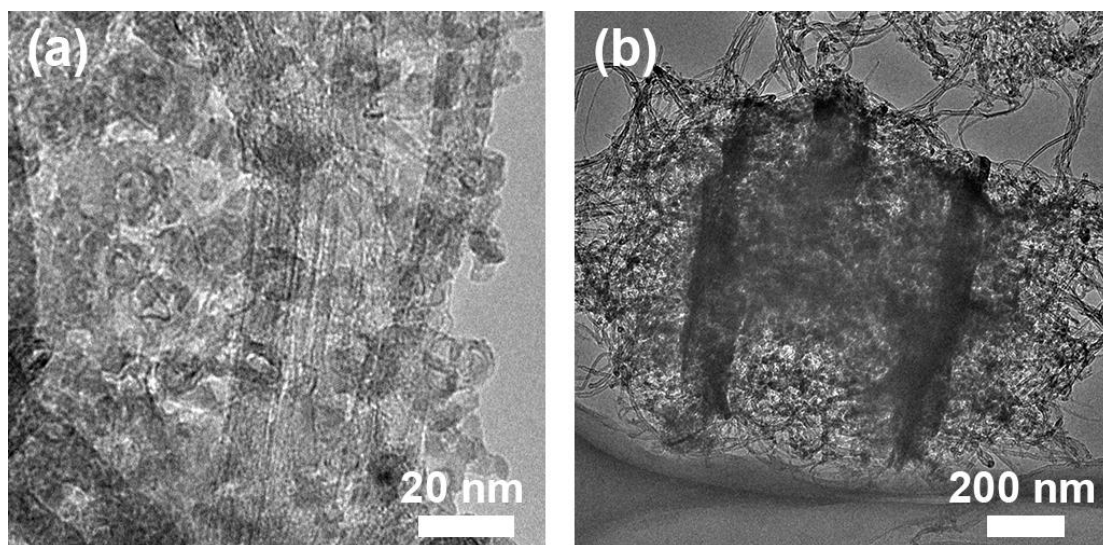

**Fig. S2.** (a) High resolution, (b) low resolution TEM images of LDO/CNT hybrids .

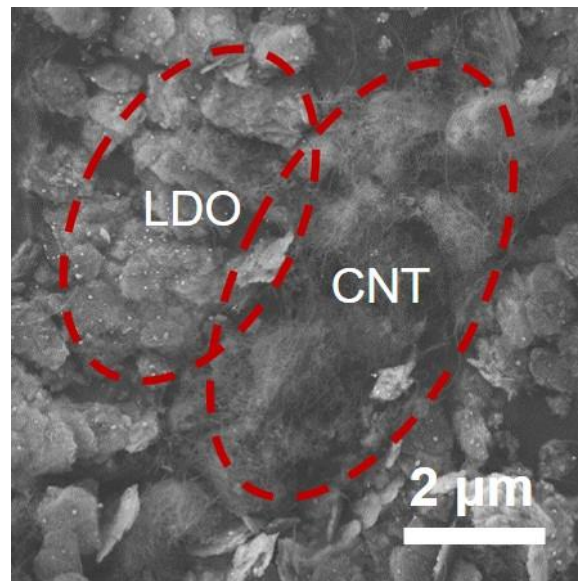

**Fig. S3.** SEM image of LDO+CNT mixture.

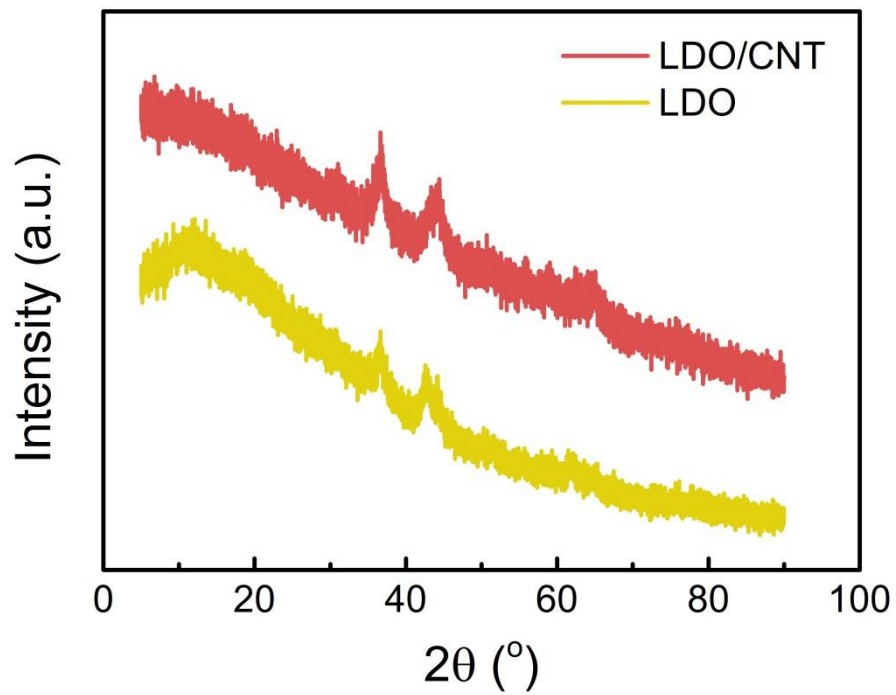

**Fig. S4.** XRD patterns of LDO/CNT hybrids and LDO flakes.

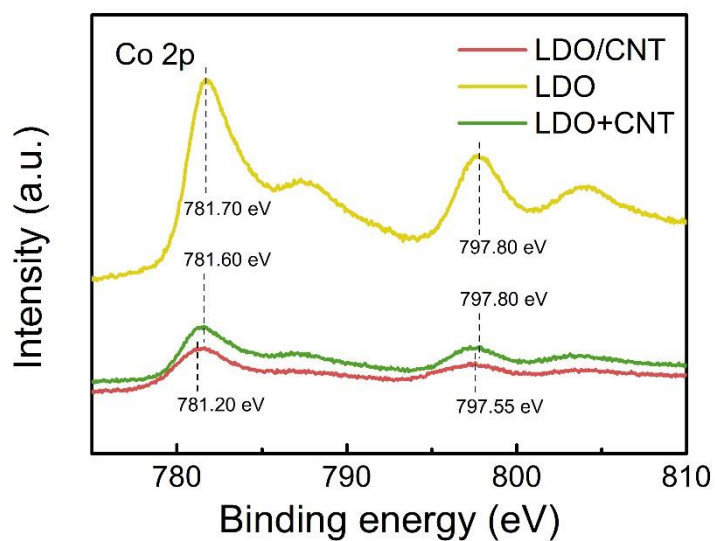

**Fig. S5.** The Co 2p spectra of LDO/CNT, LDO and LDO+CNT. Compared with LDO, LDO/CNT exhibited a shift to lower binding energy, while the peak position of LDO+CNT didn't exhibit obvious shift, indicating the chemical bond interaction between LDO and CNT in LDO/CNT, and the line-face configuration of LDO+CNT leads to an insufficient contact. The weaker peak intensity of LDO/CNT than LDO+CNT was probably due to the carbon coating on the Co-contained active centres in LDO/CNT.

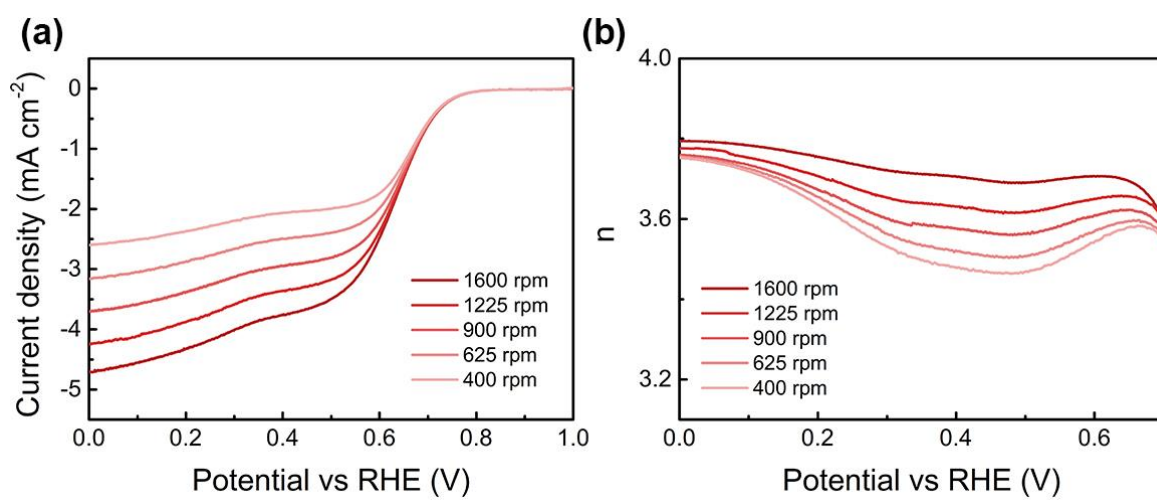

**Fig. S6.** ORR (a) LSV plots and (b) electron transfer number of LDO/CNT catalyst at different rotating rates.

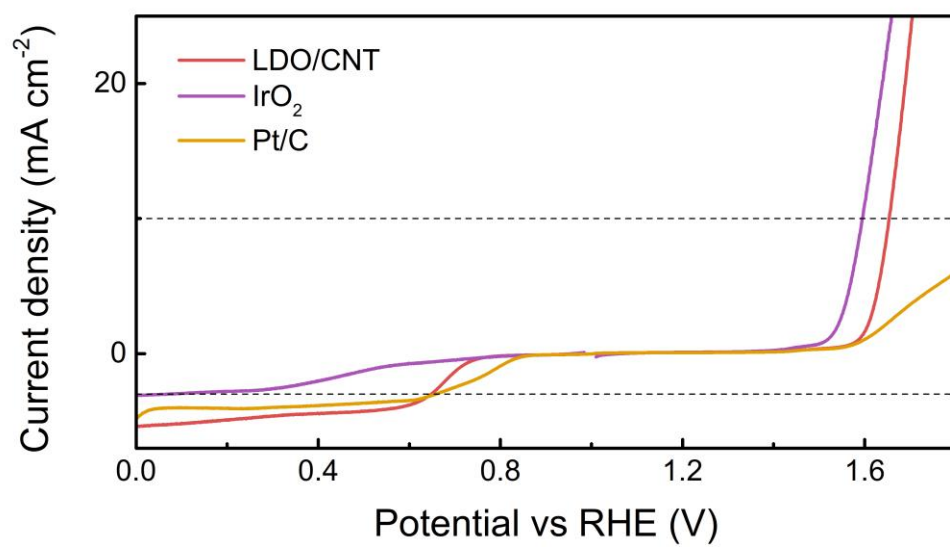

**Fig. S7.** The overall LSV plots of LDO/CNT hybrid, IrO<sub>2</sub>, and Pt/C electrocatalysts at the scan rate of 10.0 mV s<sup>-1</sup> in O<sub>2</sub>-saturated 0.10 M KOH solution.

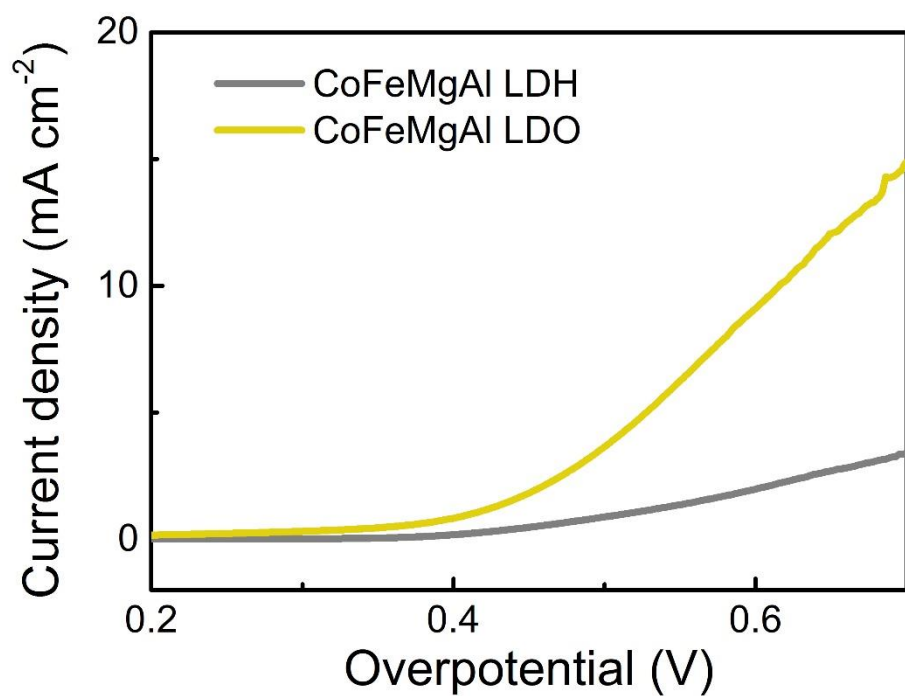

**Fig. S8.** OER LSV plots of LDH and LDO at the scan rate of 10.0 mV s<sup>-1</sup> in O<sub>2</sub>-saturated 0.10 M KOH solution.



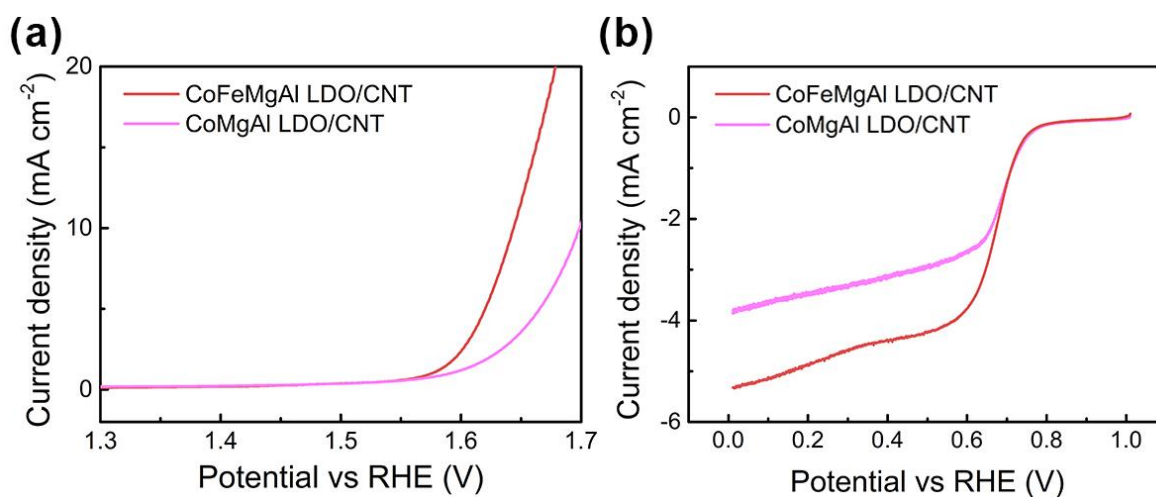

**Fig. S9.** (a) OER and (b) ORR LSV plots of CoFeMgAl LDO/CNT hybrids and CoMgAl LDO/CNT hybrids at the scan rate of 10.0 mV s<sup>-1</sup> in O<sub>2</sub>-saturated 0.10 M KOH solution. The Co content in the CoMgAl LDO was the same as the Co and Fe total content in CoFeMgAl LDO.

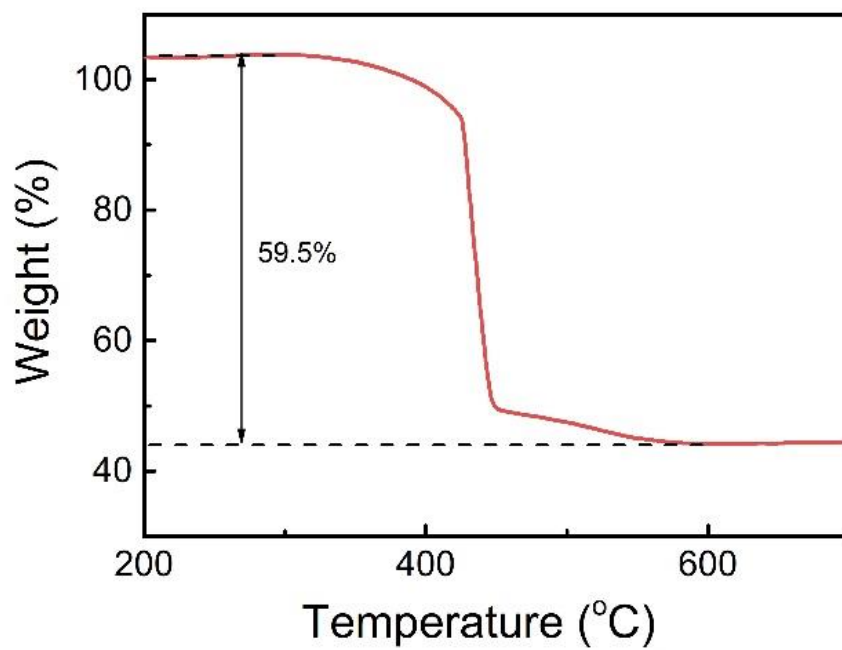

**Fig. S10.** TGA plots of LDO/CNT hybrids. The weight loss at 400-600 °C indicates that the mass fraction of CNT in the original LDO/CNT catalyst is 59.5%.

**Table S1.** Summary of  $E_{10}$ ,  $E_3$ , and  $\Delta E$  of all electrocatalysts in this contribution.

| <b>Catalysts</b> | $E_{10}$ (V) | $E_3$ (V) | <b>Potential gap<br/><math>\Delta E</math> (V)</b> |
|------------------|--------------|-----------|----------------------------------------------------|
| LDO/CNT          | 1.64         | 0.65      | 0.99                                               |
| LDO              | 1.77         | 0.06      | 1.71                                               |
| CNT              | 1.81         | 0.43      | 1.38                                               |
| LDO+CNT          | 1.73         | 0.39      | 1.34                                               |
| IrO <sub>2</sub> | 1.60         | 0.07      | 1.53                                               |
| Pt/C             | 1.94         | 0.66      | 1.28                                               |
